# Supplementary material for: Substantial organic impurities at the surface of synthetic ammonium sulfate particles
Source: Copernicus journal article supplement (doi:10.5194/amt-2021-327), 2021-11-24
Supplement: Supplementary file 1 [file amt-2021-327-supplement.pdf]

Supplement of

## Substantial organic impurities at the surface of synthetic ammonium sulfate particles

Junteng WU et al.

Correspondence to: [junteng.wu@univ-amu.fr](mailto:junteng.wu@univ-amu.fr) and [anne.monod@univ-amu.fr](mailto:anne.monod@univ-amu.fr)

### SI1. Statistical studies using AS particles since 2000

| Article number in total | Optical properties | Hygroscopicity | Phase transition | Chemical reaction |
|-------------------------|--------------------|----------------|------------------|-------------------|
| 219                     | 44                 | 115            | 49               | 62                |

| AS mark                                   | Related article number |
|-------------------------------------------|------------------------|
| Sigma-Aldrich/Merck                       | 43                     |
| Fisher Chemical/Fluka                     | 21                     |
| Alfa Aesar                                | 7                      |
| Beijing Chemical Reagent                  | 2                      |
| Mallinckrodt Baker                        | 2                      |
| EMD Millipore                             | 2                      |
| Tianjin                                   | 1                      |
| Shanghai Chemical and Medical Corporation | 1                      |
| Univar                                    | 1                      |
| wako pure chemical                        | 1                      |
| Not mentioned                             | 137                    |
| In total                                  | 219                    |

### SI2 Reagents

| Reagents                 | Mark and purity                                  | Lot                |
|--------------------------|--------------------------------------------------|--------------------|
| Ammonium sulfate crystal | ACROS Organics from Fisher Chemical, 99.5%       | A0408697           |
| Ammonium sulfate crystal | Merck, EMSURE                                    | AM1034817 833      |
| Ammonium sulfate crystal | Merck suprapur, 99.9999%                         | B1675709           |
| Liquid water             | Milli-Q water, 18.2 MΩ cm, TOC < 2ppb            | Laboratory product |
| Liquid water             | Fisher Chemical, LC-MS Grade                     | 2047076            |
| Liquid Ethanol           | Fisher Chemical, 99.8%                           | 1922061            |
| Hydrochloric acid        | Fisher Chemical, Trace metal grade               | 4118060            |
| Acetonitrile             | Fisher Chemical, Optima <sup>®</sup> LC/MS grade | 1924623            |
| Methanol                 | Fisher Chemical, Optima <sup>®</sup> LC/MS grade | 1737574            |

SI3 Raw mass spectra of CN compounds (EXP P1 at AS concentrations of 0.5M)

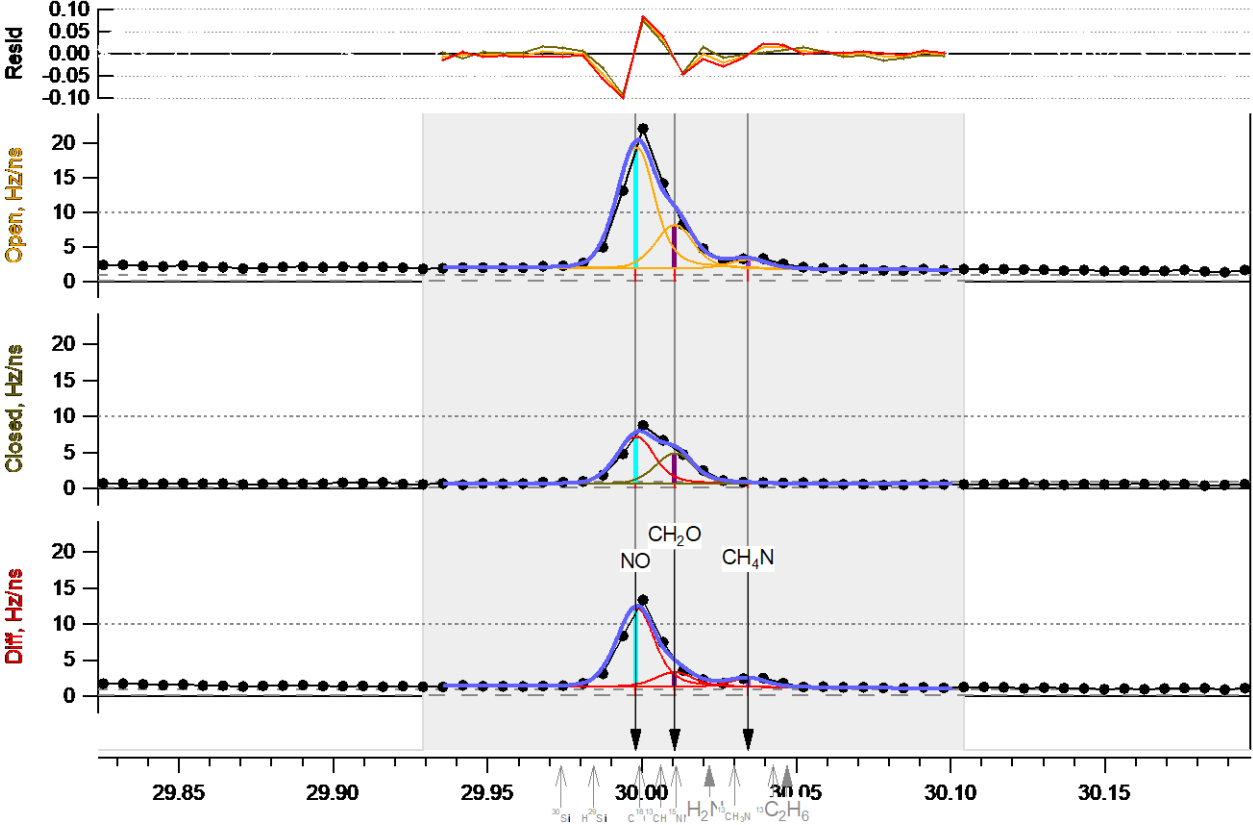

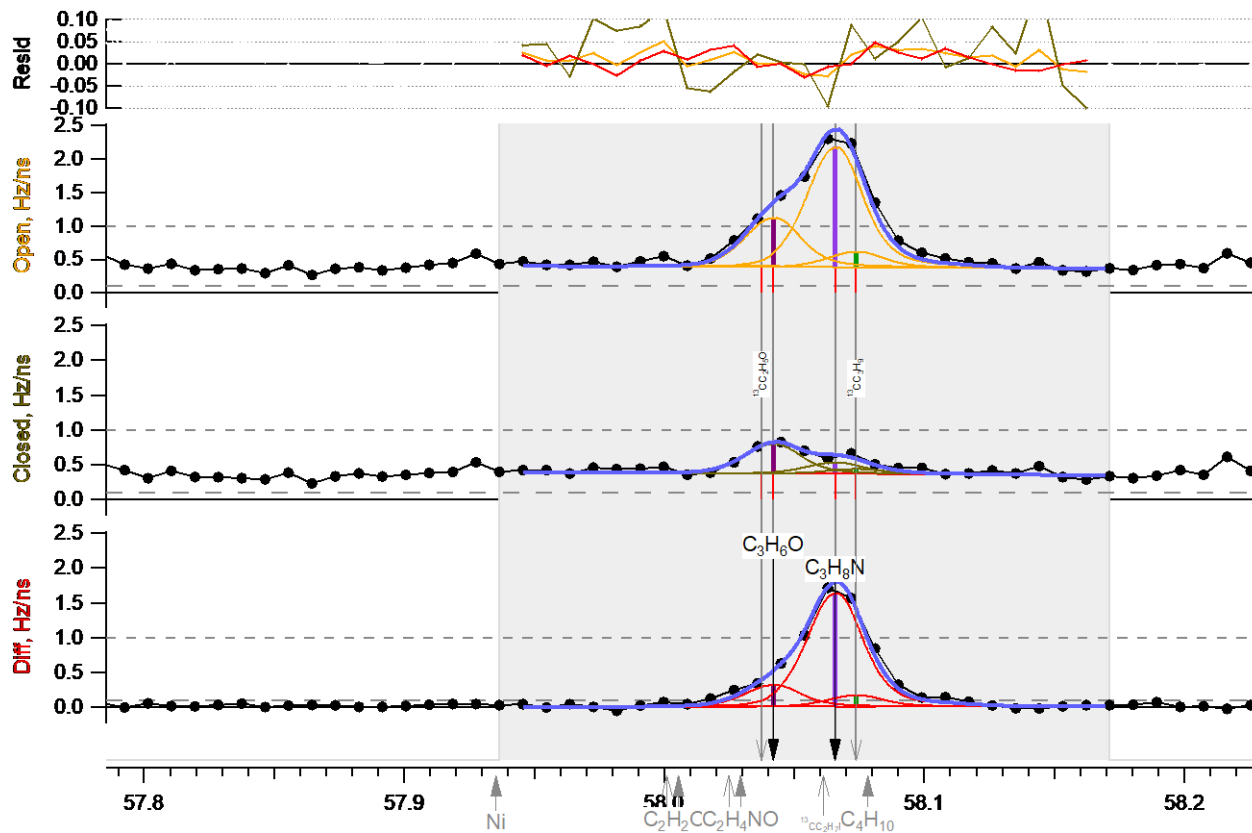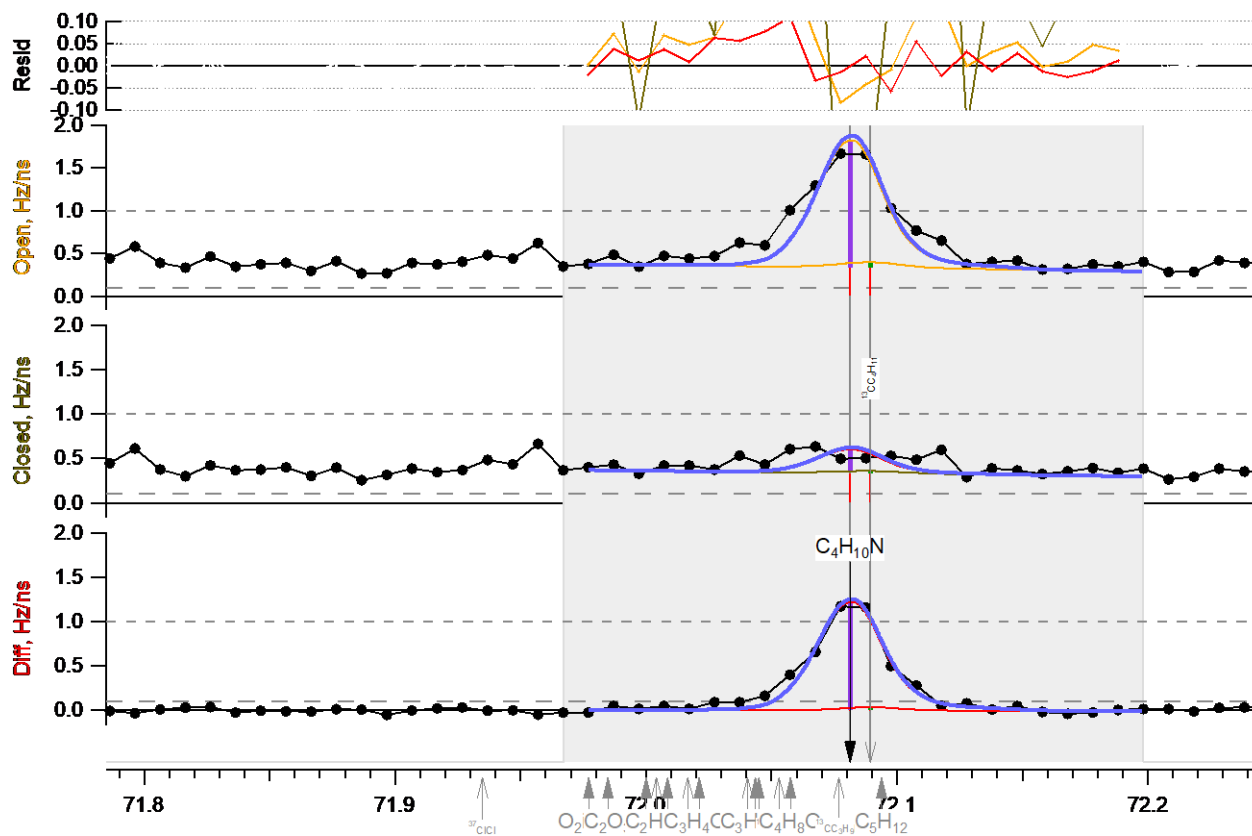

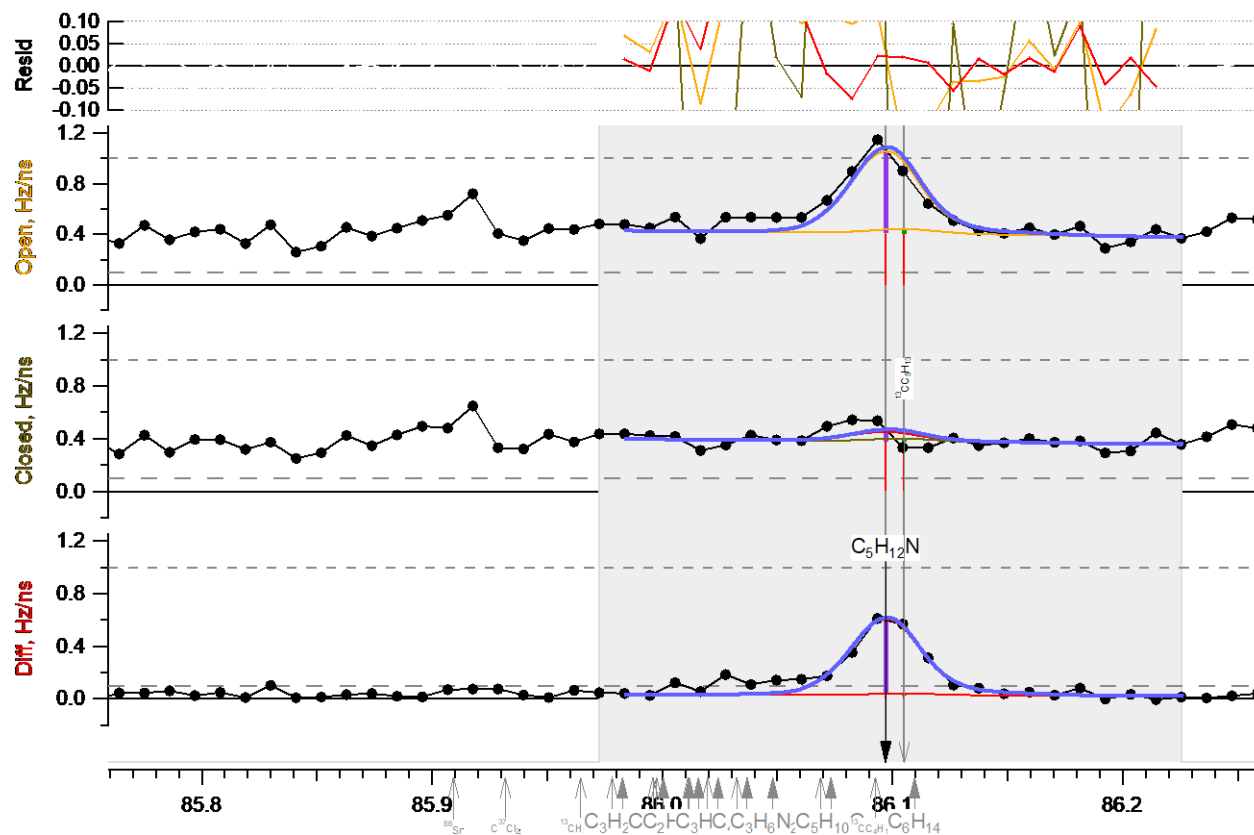

## SI4 Influence of the AAC rotational speed on the chemical content

Developed by Tavakoli and Olfert (2013), AAC is a recent commercial aerosol classifier, it selects the size by centrifuge force. The aerodynamic diameter ( $d_a$ ) of selected particles is related to the rotational speed of the concentric cylinder, the sheath flow rate and the sample flow rate. The rotational speed has been reported to influence the geometric standard deviation ( $\sigma_{geo}$ ) of size distribution, i.e., the smaller size, the higher rotational speed and the larger  $\sigma_{geo}$  (Johnson et al., 2018). This behavior is also reported in this work and is shown in **Error! Reference source not found.** To understand the influence of the rotational speed on the detection of organic traces, AS aerosols at  $d_a = 300$  nm were selected in EXP P7 (Table 1) under three different rotational conditions: 190, 285 and 369 rad/s. In Figure SI4: , the ratios of mass concentrations Org/Sulfate and CN/Sulfate are shown as a function of the rotational speed of the concentric cylinder in green and blue dots, respectively. Their averages are  $2.9 \pm 0.1\%$  and  $0.48 \pm 0.04\%$ . No significant difference has been observed with varying the rotational speed of AAC.

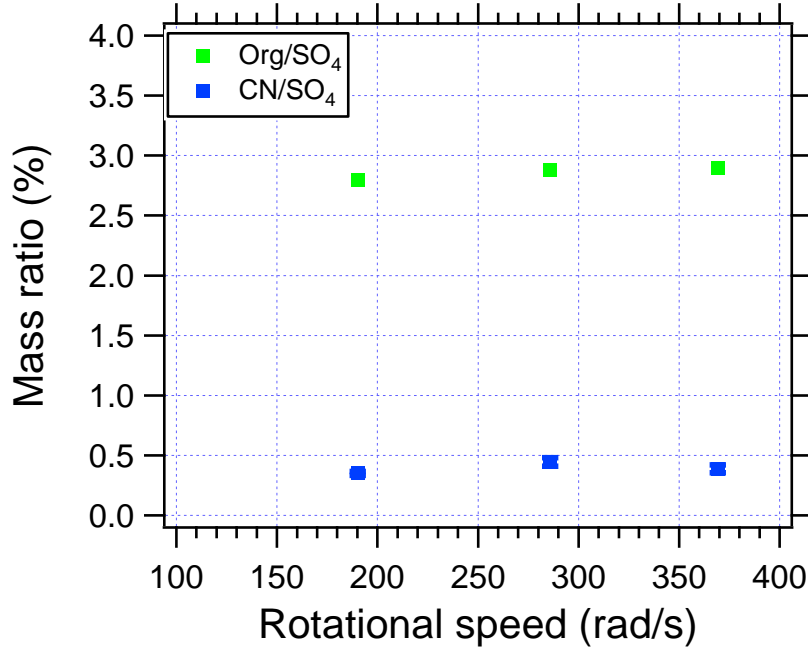

Figure SI4: Effect of the AAC rotational speed on the organic content in AS particles (at  $d_a = 300$  nm) measured by the HR-ToF-AMS (in EXP P7).

## SI5 Multi-charging corrections for the [Org]/[Sulfate] using the DMA for particle size selection

Under the hypothesis that organic compounds were coated homogenously on surface of AS aerosol particles, the density was defined as  $\rho_{org,S}$ . The correction was done by removing the effects of multi-charged modes, so the corrected [Org]/[Sulfate] were represented only by the first mode. In a first step, [Org]/[Sulfate] were calculated using equation SI5.1:

$$\frac{[Org]}{[Sulfate]_{calc}} = \frac{\sum_{1^{st} mode} (\pi d^2 N_d) \rho_{org,S}}{\sum_{1^{st} mode} \left( \frac{4}{3} \pi \frac{d^3}{2} N_d \right) \rho_{sulfate}} \quad \text{Equation SI5.1}$$

Where  $N_d$  is the number concentration at diameter  $d$ ,  $\sum_{1^{st} mode} (\pi d^2 N_d)$  is the total surface of all particles in the first mode measured by SMPS.  $\sum_{1^{st} mode} \left( \frac{4}{3} \pi \frac{d^3}{2} N_d \right)$  is the total volume of all particles in the first mode.  $\rho_{sulfate}$  is the volume density of sulfate in AS aerosols,  $96.06 \text{ g.cm}^{-3}$ .

Experimentally, [Org]/[Sulfate] mass concentration ratios were measured by the HR-ToF-AMS which considered all the particle sizes (including multi-charged modes) as described by equation SI5.2:

$$\frac{[Org]}{[Sulfate]_{exp}} = \frac{\sum_{d=0}^{\infty} (\pi d^2 N_d) \rho_{org,S}}{\sum_{d=0}^{\infty} \left( \frac{4}{3} \pi \frac{d^3}{2} N_d \right) \rho_{sulfate}} \quad \text{Equation SI5.2}$$

In the last step, combining Equation SI5.1 and Equation SI5.2, the corrected [Org]/[Sulfate] were obtained (equation SI5.3), they gather the total amounts of organics and sulfate on the first DMA mode:

$$\frac{[Org]}{[Sulfate]_{corr}} = \frac{\sum_{1^{st} mode} N_d d^2}{\sum_{1^{st} mode} N_d d^3} \times \frac{\sum_{d=0}^{\infty} N_d d^3}{\sum_{d=0}^{\infty} N_d d^2} \times \frac{[Org]}{[Sulfate]_{exp}} \quad \text{Equation SI5.3}$$

Where all diameter information was recorded by the SMPS.

SI6 Majors ions detected in LC/ESI<sup>+</sup>-MS of the aqueous solution of 1.5 M AS and their associated molecular formula and retention times.

| m/z             | Retention time     | Proposed raw formula                                                         | Error (ppm) |
|-----------------|--------------------|------------------------------------------------------------------------------|-------------|
| 96.0813         | 3.00               | C <sub>6</sub> H <sub>10</sub> N                                             | 0           |
| <b>113.1078</b> | <b>2.44</b>        | <b>C<sub>6</sub>H<sub>13</sub>N<sub>2</sub></b>                              | 0.9         |
| 209.1655        | 3.00               | C <sub>12</sub> H <sub>21</sub> N <sub>2</sub> O                             | 0.5         |
| 223.1450        | 2.73               | C <sub>12</sub> H <sub>19</sub> N <sub>2</sub> O <sub>2</sub>                | 1.3         |
| <b>225.1600</b> | <b>3.02 ; 3.36</b> | <b>C<sub>10</sub>H<sub>21</sub>N<sub>2</sub>O<sub>2</sub></b>                | <b>1.3</b>  |
| <b>226.1918</b> | <b>2.89 ; 3.11</b> | <b>C<sub>12</sub>H<sub>24</sub>N<sub>3</sub>O</b>                            | <b>0.4</b>  |
| <b>227.1762</b> | <b>3.51</b>        | <b>C<sub>12</sub>H<sub>23</sub>N<sub>2</sub>O<sub>2</sub></b>                | <b>0.9</b>  |
| 241.1553        | 2.73 ; 3.01        | C <sub>12</sub> H <sub>21</sub> N <sub>2</sub> O <sub>3</sub>                | 0.4         |
| 245.1862        | 3.21               | C <sub>12</sub> H <sub>25</sub> N <sub>2</sub> O <sub>3</sub>                | 1.2         |
| 269.0962        | 2.86 ; 3.93        | C <sub>12</sub> H <sub>17</sub> N <sub>2</sub> O <sub>3</sub> S              | 0.7         |
| 303.1012        | 2.76 ; 3.08        | C <sub>12</sub> H <sub>19</sub> N <sub>2</sub> O <sub>5</sub> S              | 1           |
| 306.1487        | 2.89               | C <sub>12</sub> H <sub>24</sub> N <sub>3</sub> O <sub>4</sub> S              | 0.3         |
| 307.1328        | 3.00               | C <sub>12</sub> H <sub>23</sub> N <sub>2</sub> O <sub>5</sub> S              | 0           |
| 321.1117        | 2.73               | C <sub>12</sub> H <sub>21</sub> N <sub>2</sub> O <sub>6</sub> S              | 0.9         |
| <b>340.2599</b> | <b>3.97</b>        | <b>C<sub>18</sub>H<sub>34</sub>N<sub>3</sub>O<sub>3</sub></b>                | <b>0.3</b>  |
| 343.0997        | 2.72               | C <sub>11</sub> H <sub>23</sub> N <sub>2</sub> O <sub>6</sub> S <sub>2</sub> | 0.3         |
| 349.0528        | 2.55 ; 3.12        | C <sub>12</sub> H <sub>17</sub> N <sub>2</sub> O <sub>6</sub> S <sub>2</sub> | 0           |
| 420.2164        | 3.49               | C <sub>18</sub> H <sub>34</sub> N <sub>3</sub> O <sub>6</sub> S              | 1           |
| 456.1835        | 3.25               | C <sub>17</sub> H <sub>34</sub> N <sub>3</sub> O <sub>7</sub> S <sub>2</sub> | 0.7         |
| 533.3006        | 3.88               | C <sub>24</sub> H <sub>45</sub> N <sub>4</sub> O <sub>7</sub> S              | 0.6         |

In this table, the bold m/z were studied in more details using LC/ESI<sup>+</sup>-MS-MS (shown in SI below).

SI7 LC/ESI<sup>+</sup>-MS-MS of the most intense ions found in the acetonitrile liquid-liquid extracts of aqueous AS solution and their fragments (experiment C9).

| Precursor ion m/z | Fragment ions m/z                                     |
|-------------------|-------------------------------------------------------|
| 113.108           | 96.082 ; 81.059 ; 79.056 ; 69.072                     |
| 225.160           | 125.107 ; 113.108 ; 96.082 ; 85.030 ; 79.056 ; 69.072 |
| 226.192           | 114.092 ; 113.108 ; 96.082 ; 79.056 ; 72.082 ; 69.072 |
| 227.177           | 113.108 ; 96.082 ; 79.056 ; 69.072                    |
| 340.260           | 228.160 ; 132.103 ; 114.092 ; 96.082 ; 69.072         |

Johnson, T. J., Irwin, M., Symonds, J. P. R., Olfert, J. S., and Boies, A. M.: Measuring aerosol size distributions with the aerodynamic aerosol classifier, *Aerosol Sci. Technol.*, 52, 655–665, <https://doi.org/10.1080/02786826.2018.1440063>, 2018.

Tavakoli, F. and Olfert, J. S.: An Instrument for the Classification of Aerosols by Particle Relaxation Time: Theoretical Models of the Aerodynamic Aerosol Classifier, *Aerosol Sci. Technol.*, 47, 916–926, <https://doi.org/10.1080/02786826.2013.802761>, 2013.
